# Supplementary material for: Chrom3D: three-dimensional genome modeling from Hi-C and nuclear lamin-genome contacts
Source: PubMed Central journal article supplement (PMC5278575; doi:10.1186/s13059-016-1146-2), 2017-01-30
Supplement: 13059_2016_1146_MOESM1_ESM.pdf [file 13059_2016_1146_MOESM1_ESM.pdf]

## Additional file 1

**Table S1** FISH probe information.

| ProbeID                                                           | Placement    | CloneID     | Chr_FISH | Start_FISH | End_FISH  | Chr_BEAD | Start_BEAD | End_BEAD  |
|-------------------------------------------------------------------|--------------|-------------|----------|------------|-----------|----------|------------|-----------|
| c1                                                                | Center       | RP11-75H6   | chr19    | 951641     | 1144485   | chr19    | 0          | 1620000   |
| c2                                                                | Center       | RP11-91N21  | chr21    | 15964909   | 16121996  | chr21    | 15810000   | 16150000  |
| c3                                                                | Center       | RP11-516D7  | chr4     | 189080551  | 189262582 | chr4     | 189080000  | 190540000 |
| i1                                                                | Intermediate | RP11-88D10  | chr4     | 107517202  | 107724374 | chr4     | 106600000  | 108670000 |
| i2                                                                | Intermediate | RP11-59F18  | chr6     | 112896841  | 113061362 | chr6     | 112660000  | 114290000 |
| i3                                                                | Intermediate | RP11-6F19   | chr4     | 166935539  | 166958075 | chr4     | 166770000  | 167010000 |
| i4                                                                | Intermediate | RP11-81F21  | chr2     | 205370883  | 205533061 | chr2     | 204320000  | 206540000 |
| p1                                                                | Periphery    | RP11-337B18 | chr2     | 163702326  | 163901711 | chr2     | 163190000  | 163990000 |
| p2                                                                | Periphery    | RP11-79L13  | chr2     | 163002269  | 163175338 | chr2     | 163010000  | 163170000 |
| p3                                                                | Periphery    | RP11-96A1   | chr4     | 120850223  | 121025851 | chr4     | 120720000  | 121000000 |
| <b>Predicted locus localization across 400 genome structures:</b> |              |             |          |            |           |          |            |           |
| <b>Center</b>                                                     |              |             |          |            |           |          |            |           |
| <b>Intermediate</b>                                               |              |             |          |            |           |          |            |           |
| <b>Periphery</b>                                                  |              |             |          |            |           |          |            |           |

**Table S2** Top 10 enriched GO terms for genes in LADs specific to control or FPLD2 patient fibroblasts.

| GO ID                                           | Description                              | No. genes | Total No. genes in term | P-value |
|-------------------------------------------------|------------------------------------------|-----------|-------------------------|---------|
| <b>LADs gained in FPLD2 patient fibroblasts</b> |                                          |           |                         |         |
| GO:0007399                                      | nervous system development               | 155       | 2195                    | 3.9e-07 |
| GO:0010578                                      | regulation of adenylate cyclase activity | 8         | 18                      | 8.0e-07 |
| GO:0007626                                      | locomotory behavior                      | 27        | 205                     | 2.1e-06 |
| GO:0007423                                      | sensory organ development                | 50        | 520                     | 2.6e-06 |
| GO:0050877                                      | neurological system process              | 100       | 1316                    | 3.0e-06 |
| GO:0032501                                      | multicellular organismal process         | 394       | 6936                    | 9.2e-06 |
| GO:0007610                                      | behavior                                 | 60        | 701                     | 1.1e-05 |
| GO:0003008                                      | system process                           | 134       | 1955                    | 1.3e-05 |
| GO:0007187                                      | G-protein coupled receptor signaling     | 22        | 179                     | 5.2e-05 |
| GO:0030182                                      | neuron differentiation                   | 94        | 1312                    | 6.2e-05 |
| <b>LADs lost in FPLD2 patient fibroblasts</b>   |                                          |           |                         |         |
| GO:0009593                                      | detection of chemical stimulus           | 532       | 60                      | 4.4e-11 |
| GO:0033139                                      | regulation of peptidyl-serine phosph.    | 19        | 10                      | 2.0e-09 |
| GO:0002323                                      | natural killer cell activation           | 30        | 12                      | 2.5e-09 |
| GO:0050909                                      | sensory perception of taste              | 60        | 16                      | 5.5e-09 |
| GO:0007600                                      | sensory perception                       | 992       | 84                      | 1.2e-08 |
| GO:0050877                                      | neurological system process              | 1316      | 102                     | 3.0e-08 |
| GO:0042501                                      | serine phosphorylation of STAT protein   | 24        | 10                      | 3.5e-08 |
| GO:0007186                                      | G-protein coupled receptor signaling     | 1291      | 100                     | 4.3e-08 |
| GO:0030101                                      | natural killer cell activation           | 75        | 15                      | 9.8e-07 |
| GO:0030183                                      | B cell differentiation                   | 110       | 18                      | 1.8e-06 |

**Table S3** ChIP-qPCR primers and genomic location of amplicons.

| <b>Amplicon</b> | <b>Chromosome</b> | <b>Forward primer (F)<br/>Reverse primer (R)</b>    | <b>Genomic position (nt)</b> |
|-----------------|-------------------|-----------------------------------------------------|------------------------------|
| Chr3r1          | Chr 3             | F: CCCTCAGCATAGCGGTGTAG<br>R: AGAACTCAGTGAGGGCTTGC  | 38868181-38873708            |
| Chr7r1          | Chr 11            | F: AGCTGTCTTCTGCCAGCAAT<br>R: ATGCCTTTGAGAGGCTGACC  | 141316843-141322985          |
| Chr8r1          | Chr 8             | F: TGCTAGCTGACAGGTGATGC<br>R: GTTGTCGTGCTAACGGCTG   | 6834856-6836060              |
| Chr9r1          | Chr 9             | F: GAAGCCCCTTGGGTACCTTC<br>R: AGCCAGTGTCTGCTGGATTC  | 110660385-110663316          |
| Chr11r1         | Chr 11            | F: CCCCCTCTGGTCTACAGGAT<br>R: GGAGTCTGGCAGGTAAACCA  | 59388905-59390474            |
| Chr12r1         | Chr 12            | F: CCCTTCAAGGTGATGGGGTT<br>R: AGTGCAAGAACTTTCGGGCT  | 7833314-7833620              |
| Chr12r2         | Chr 12            | F: CTCCCAGGCATGTCTCACTT<br>R: GAATGCTTTGCAGTCACCCC  | 129887824-129888838          |
| Chr13r1         | Chr 13            | F: ACCTGCTGCTATGGTGCATT<br>R: GGCTGAAGTCTGCTGTGTCT  | 27414218-27417293            |
| Chr14r1         | Chr 14            | F: AGCTAACAGGACAGAGTGCT<br>R: TGTGCATGGGAAGGTCTTGG  | 104288010-104288880          |
| Chr21r1         | Chr 21            | F: GGTCCCCAACAGCCTTACAA<br>R: CCTGCACGAATCCTGACCTT  | 41458227- 41459362           |
| Chr22r1         | Chr 22            | F: CTGGACCAGGGGAAACTGAC<br>R: GATTTTCAGCCACCCCCTGA  | 37524006-37524443            |
| <i>TAS2R38</i>  | Chr 7             | F: CACTCAGGAACAGCAGTCCA<br>R: CTGACCAATGCCTTCGTTTT  |                              |
| <i>TCN1</i>     | Chr 11            | F: ACTTGGTAGGGATGCTGTGC<br>R: AAAAGGGTGGCAGGAGATGG  |                              |
| <i>DNAL4</i>    | Chr 22            | F: CTGGCTCTTTCCAAGGAGGG<br>R: TACGAAGCCACCCACAGTTC  |                              |
| <i>NANOG</i>    | Chr 12            | F: AAGTCCTGGGAAGCGTTGAC<br>R: GCAGCTACCAGTCAGAAGCA  |                              |
| <i>SCN10A</i>   | Chr 3             | F: TGTCACCAGTCCTTCCATGC<br>R: GGAAGAGGGTGAGGGAAAGC  |                              |
| <i>ACTL7A</i>   | Chr 9             | F: GGATCAGGTTCCAGGGTGTGG<br>R: GGACCTAGCGTGCAACTCTT |                              |
| <i>KRT23</i>    | Chr 17            | F: GACTGCCCTGGATGGTTTTTA<br>R: ACAACAACAGTGTGCGAAGG |                              |
| <i>RPA4</i>     | Chr X             | F: TAGGGTGGGCTGAAAAACAG<br>R: CCGGATTGCTGGTTAAAGA   |                              |
| <i>BACE2</i>    | Chr 21            | F: CCCAGCACCATAGGCTTGAA<br>R: GGATGGCAGAGCTGTCTTGT  |                              |
| <i>DEFA3</i>    | Chr 8             | F: CCCGGGCATGGTCTAGAATC<br>R: AGCCCTTACATCCATTGGG   |                              |
| <i>ATP5EP2</i>  | Chr 13            | F: GTCAAACCTGCACAGGGCTTG<br>R: CAGCCTGGTTCTGATGGTGT |                              |

Paulsen et al. Additional file 1

|              |        |                                                    |
|--------------|--------|----------------------------------------------------|
| <i>GYS2</i>  | Chr 21 | F: CACAGGCTACAGGAGCACAA<br>R: AAGTGATGCCACAAGTGCCT |
| <i>AJAP1</i> | Chr 1  | F: TTACCCTGGCAACACCATCC<br>R: TTGCGAAAGGCTCGAGAGAG |
| <i>STX2</i>  | Chr 12 | F: CCAAGCACCCAGCACTCTAA<br>R: CAAAGGACTGTGCACCAAGC |
| <i>LDHB</i>  | Chr 12 | F: TTGGAAATCCGAGTACCGCC<br>R: AAGCCTCTGGAAGGAGACCT |
| <i>HOXB9</i> | Chr 17 | F: TCTCCTGTGGATTGCTGCTG<br>R: GCAGGCCCTCATTTCCTCTT |

---

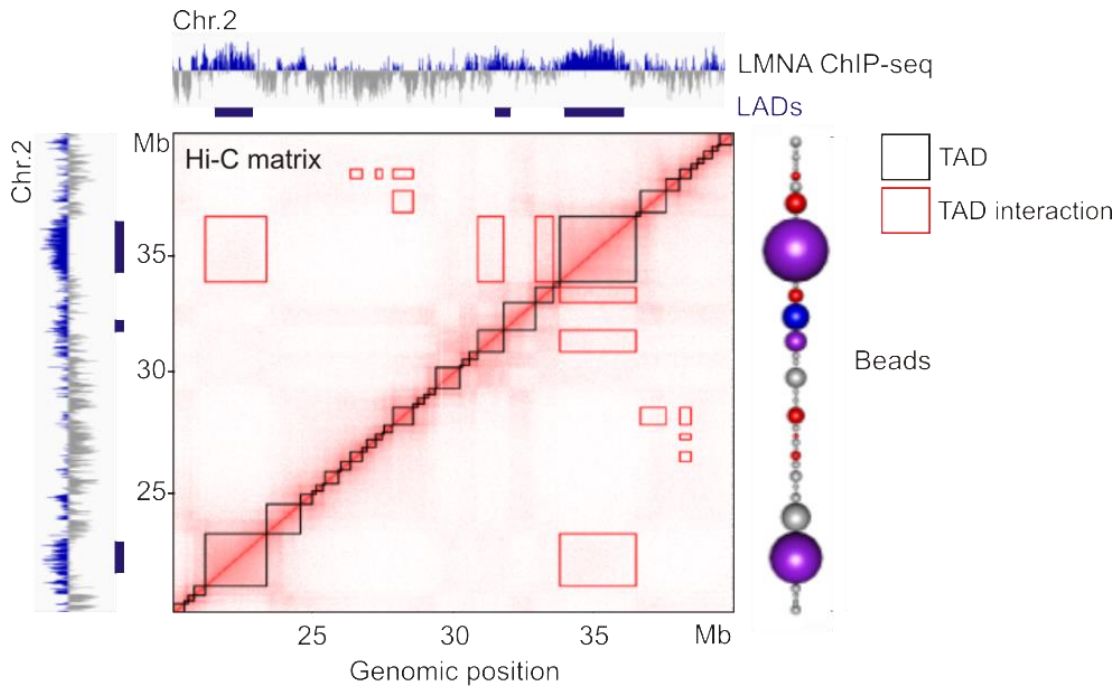

**Fig. S1** Source data for Chrom3D modeling. Chrom3D is based on the integration of significant interactions between TAD pairs determined from Hi-C data (red boxes in the Hi-C matrix) and of interactions of TADs with the nuclear periphery. The latter is determined from the mapping of LMNA LADs from ChIP-seq data (enrichment ratios, and LADs shown in blue) and by ascribing a LAD to a TAD. This is shown here for a 20 Mb region of human chromosome 2. Each chromosome is modeled as a beads-on-a-string structure, where each bead corresponds to a TAD (black squares). The interaction constraints are imposed on the beads with significant interactions inferred from Hi-C data (red squares); here illustrated as red beads. TADs with only LAD constraints are shown as blue beads, while TADs with both LAD and significant Hi-C constraint are represented as purple beads. The TADs without any constraints are depicted as gray beads. See also Figure 1a for a schematic representation of Chrom3D principles.

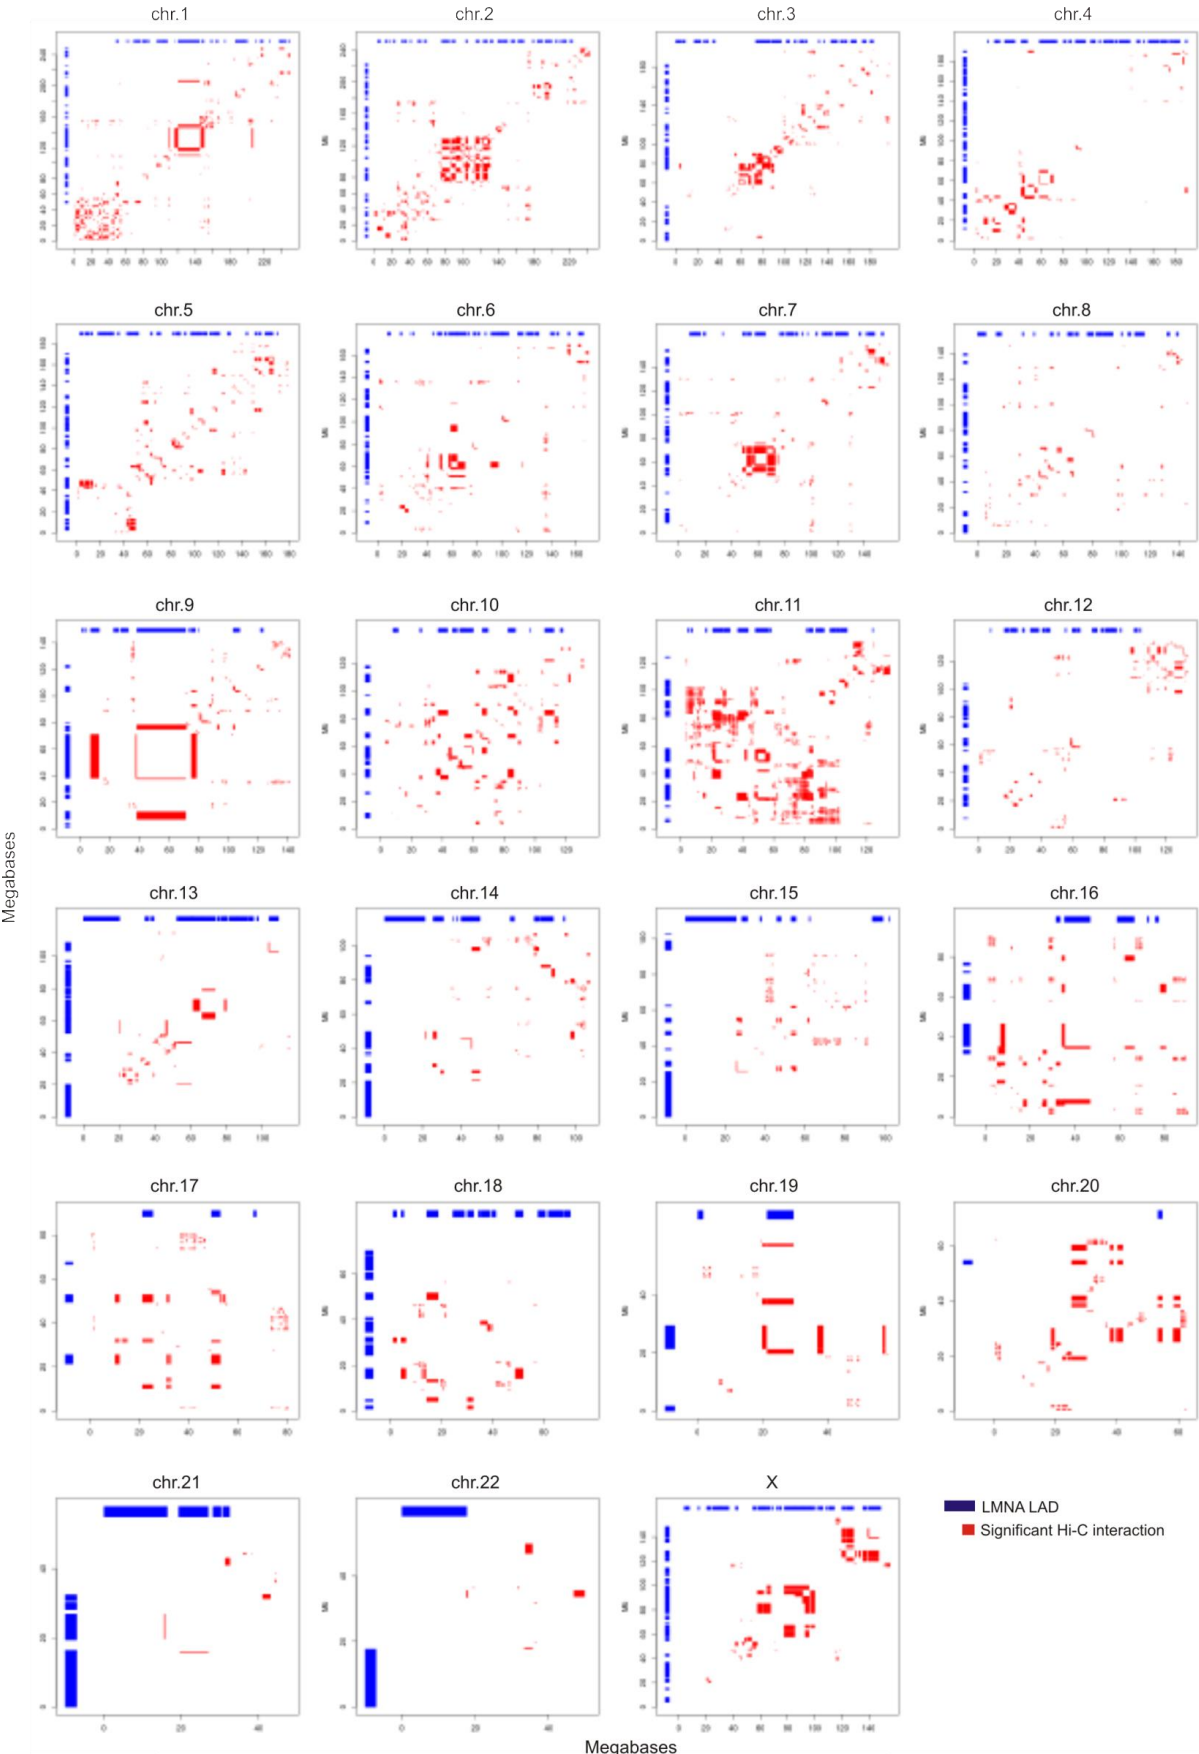

**Fig. S2** Hi-C and LMNA-LAD constraints integrated in Chrom3D. LMNA-LADs mapped from LMNA ChIP-seq data in HeLa cells (blue bars) and significant interactions determined from high-resolution Hi-C data also in HeLa cells (red) are shown for all chromosomes.

| Move        | Description                                                                                                                                        | Affected chromosome domain | Illustration                                                                        |
|-------------|----------------------------------------------------------------------------------------------------------------------------------------------------|----------------------------|-------------------------------------------------------------------------------------|
| Crankshaft  | Rotation of a central part of a chromosome (one or more beads) without perturbing coordinates of the rest of the chromosome                        | Part of chromosome         | 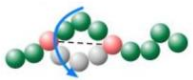 |
| ArmRotate   | Rotation of part of one of the chromosome arms without perturbing coordinates of the rest of the chromosome                                        | Part of chromosome         |  |
| ArmWiggle   | A random-walk re-sampling of one part of a chromosome arm, without perturbing coordinates of the rest of the chromosome                            | Part of chromosome         |  |
| Translation | Shift in the position of all beads of a given chromosome without perturbing any other chromosome                                                   | Whole chromosome           |  |
| Rotation    | Rotation of an entire chromosome along an axis defined by two randomly selected beads along the chromosome without perturbing any other chromosome | Whole chromosome           |  |

**Fig. S3** Chromosome moves introduced in the Chrom3D modeling framework.



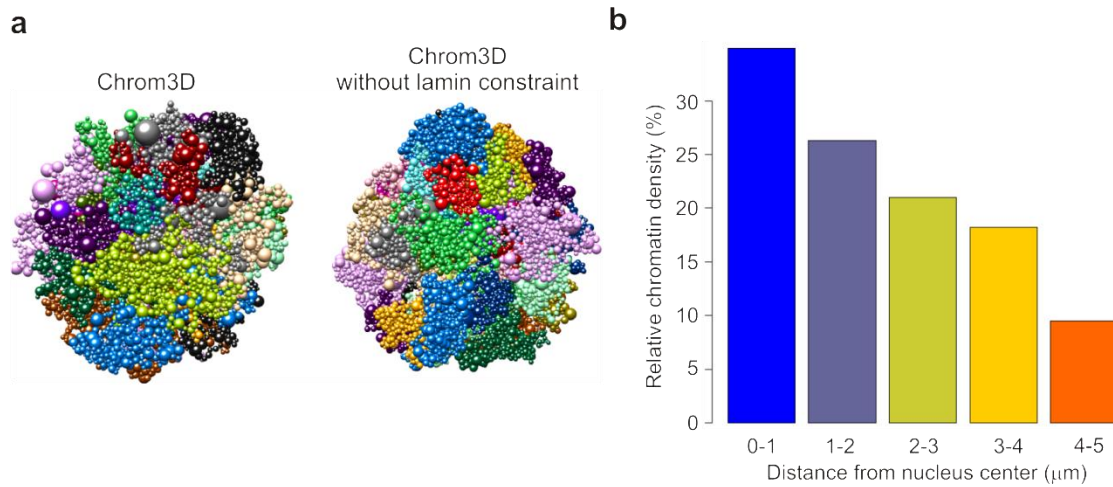

**Fig. S4** Structure characteristics. **a** Examples of 3D genome structures modeled using Chrom3D (Hi-C and LMNA ChIP-seq data used as constraints) and using Chrom3D without the LMNA ChIP-seq constraint. **b** Relative chromatin density determined from 400 structures, in consecutive 1  $\mu\text{m}$ -thick shells throughout the modeled nuclei. Chromatin density is defined as the ratio of (total bead volume in the shell / volume of the shell) and expressed as percentage.

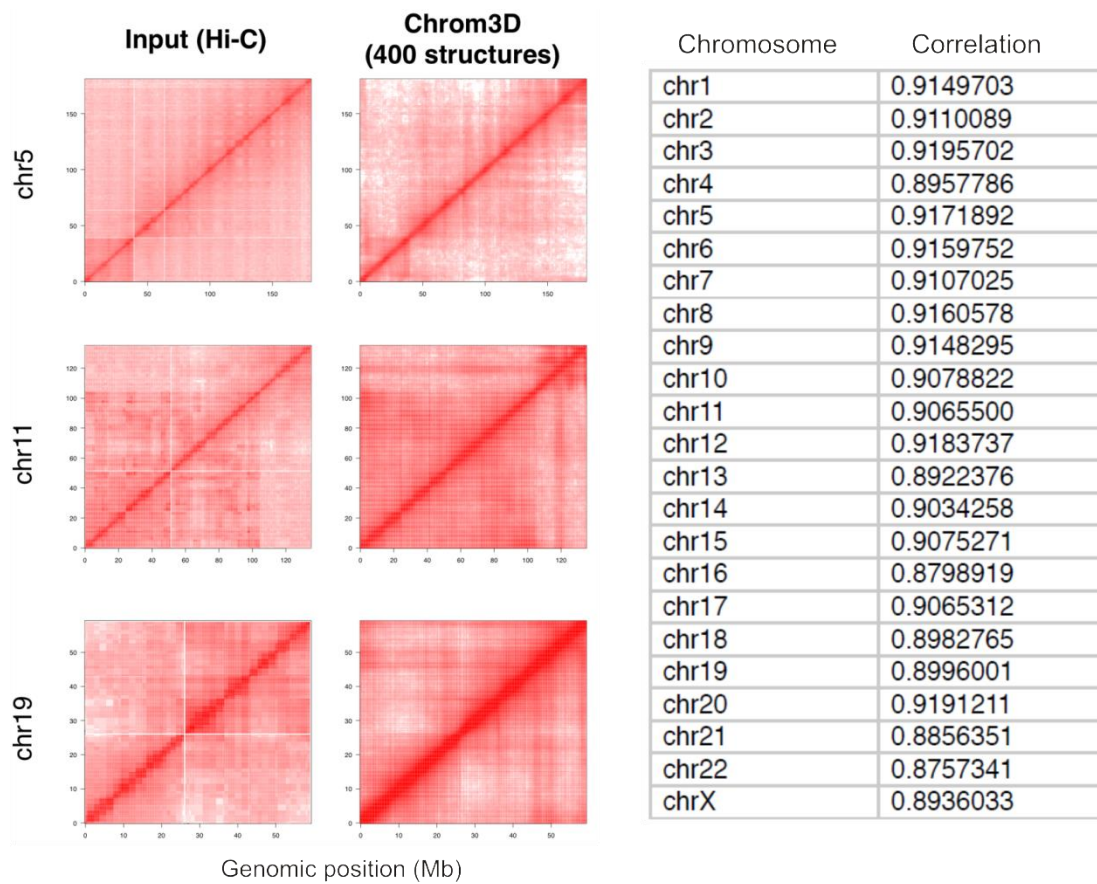

**Fig. S5** Correlation analysis between interaction frequency matrices reconstructed from 400 modeled structures and matrices from input Hi-C data. Examples of matrices are shown for three chromosomes. Correlations are shown for all chromosomes.

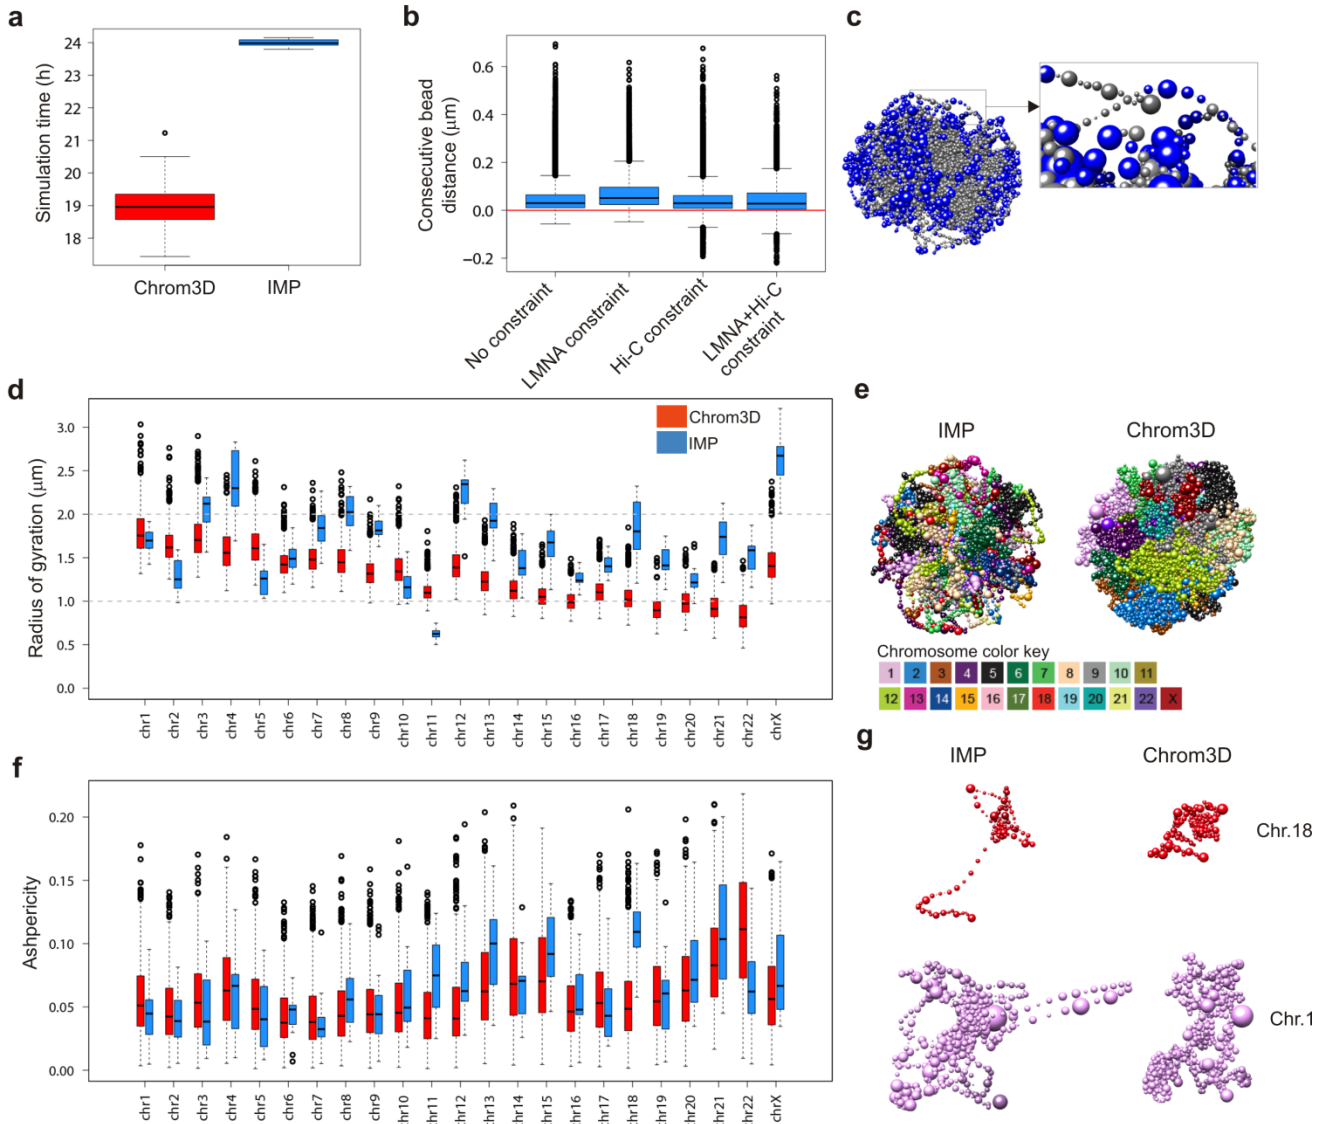

**Fig. S6** Chrom3D and IMP comparison. **a** Total simulation time to convergence for 400 structures using Chrom3D and IMP. **b** Consecutive inter-bead distance in chromosome polymer chains for indicated IMP modeling constraints. Distance is measured by the Euclidean distance between two bead centers minus bead radii. Inter-bead distance with Chrom3D is by design zero regardless of constraint (red line). **c** An IMP 3D structure showing increased inter-bead distance upon constraining beads to the NP (blue beads represent A-TADs). **d** Radius of gyration (reflecting chromosome area) of each chromosome across 400 structures generated with Chrom3D, and 10 structures with IMP. **e** Chrom3D and IMP structures highlighting individual chromosomes. **f** Asphericity of chromosomes modeled by Chrom3D and IMP. **g** Asphericity shown for chromosomes 18 and 1. IMP code is available at <http://folk.uio.no/jonaspaui/imp-lamin>.

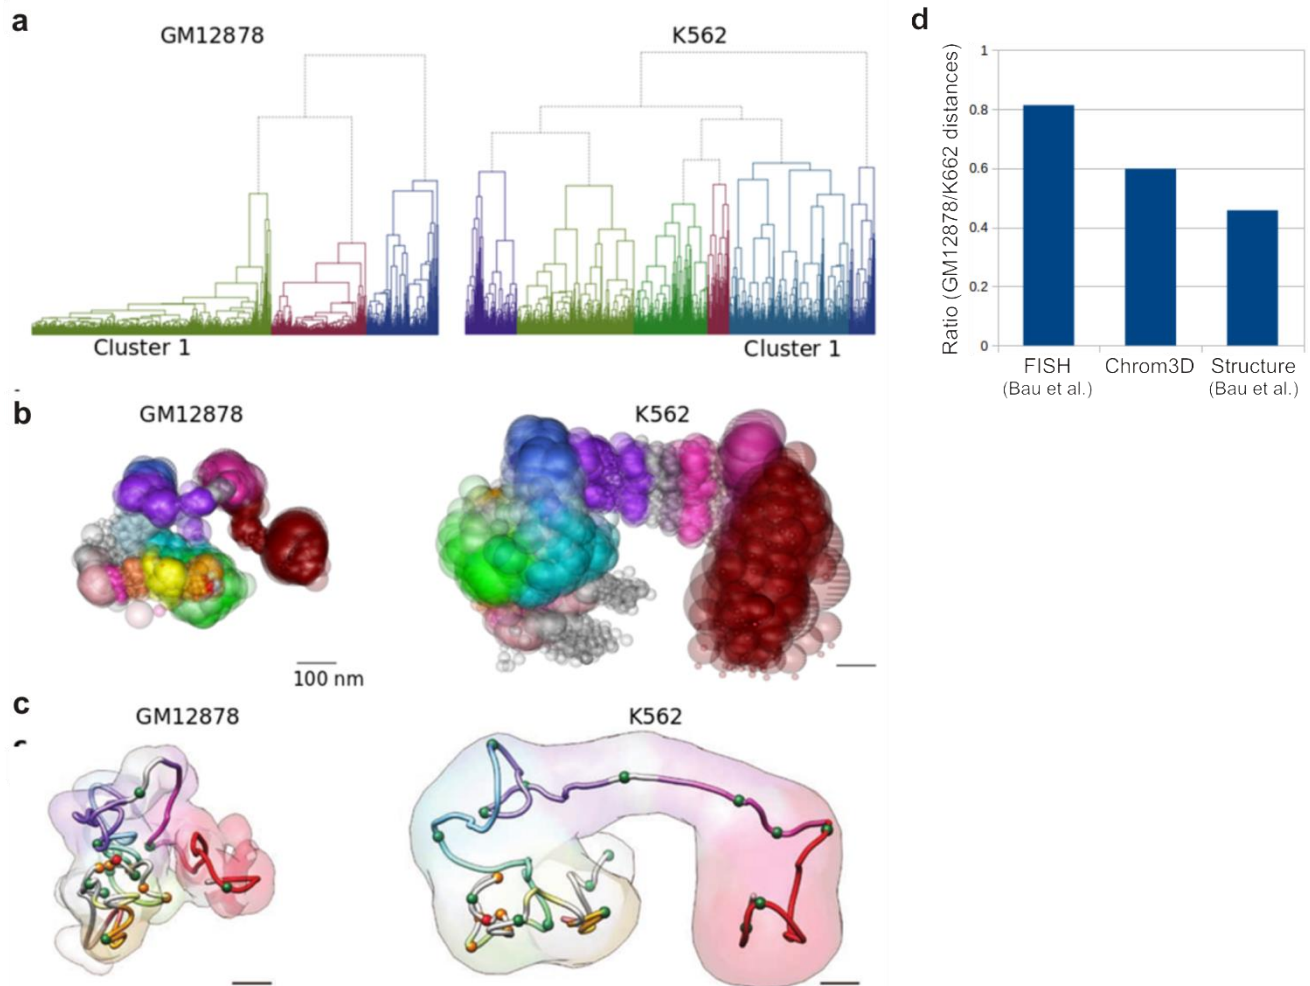

**Fig. S7** Chrom3D modeling of the ENm008 ENCODE region containing the  $\alpha$ -globin locus. **a** Clustering of 1,000 Chrom3D structures inferred from 5C data from Bau et al. [13] in GM12878 and K562 cells, in which the  $\alpha$ -globin gene is respectively repressed and expressed. Note the range of structural clusters in K562 cells. **b** Chrom3D structures of the  $\alpha$ -globin locus. Structures are shown as all structures from 'Cluster 1' for each cell type (672 and 314 structures for GM12878 and K562 respectively), superimposed with high transparency. The distance between the two ends of the modeled region (beads at positions 55911-56690 and 402437-418222 on chromosome 16) is greater in K562 than in GM12878, consistent with previously published structures. **c** Structures from Bau et al. [18] (reproduced with permission). In **b** and **c**, scale bar is 100 nm. **d** Ratios of distance between two end-beads in structures modeled by Chrom3D and by Bau et al [18] between GM12878 and K562 cells. Distance ratios for FISH probes from Bau et al. are also plotted.

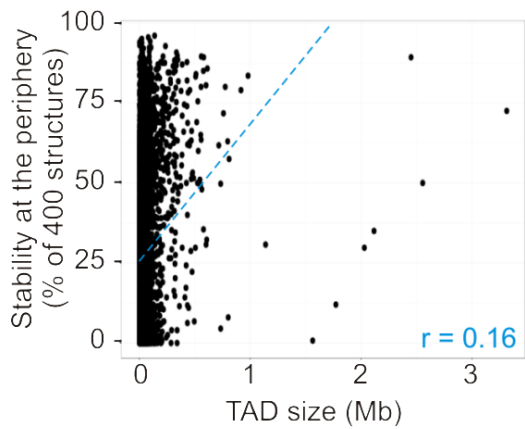

**Fig. S8** Stability of TADs at the nuclear periphery as a function of TAD size, across 400 structures. Nuclear periphery is defined as in Fig. 2a. Note the lack of correlation, indicating that stability of placement of TADs at the NP across structures (Fig. 3b) is not merely influenced by TAD size.

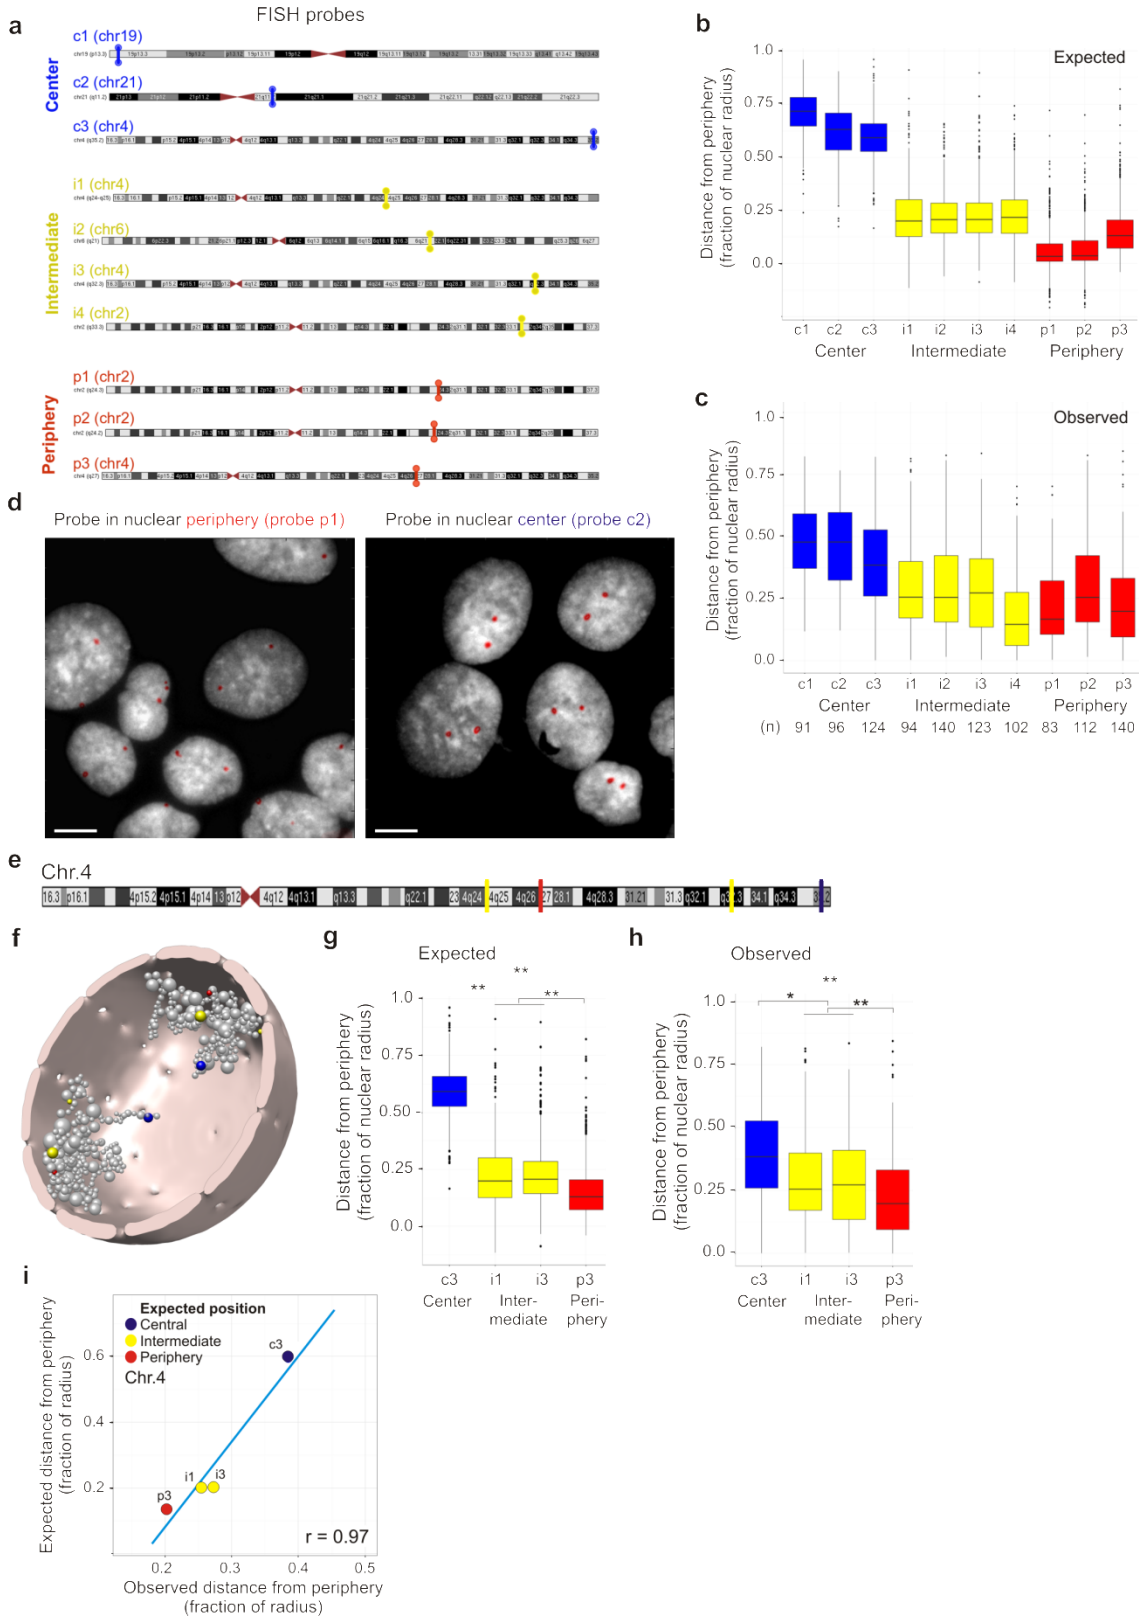

**Fig. S9** FISH validation of radial LAD placement predicted by Chrom3D. **a** Genomic position of FISH probes. **b** Expected radial distribution of FISH probe across 400 structures. **c** Observed distribution

of FISH signals. **n**, numbers FISH signals analyzed. **d** Representative FISH images. Bars, 10  $\mu\text{m}$ . **e** Position of FISH probes on Chr.4. **f** Representative structure showing spatial distribution of FISH probes on Chr.4. **g** Expected radial distribution of Chr.4 FISH probes across 400 structures. **\*\*P** <  $2.2 \times 10^{-16}$  (Mann-Whitney U test). **h** Observed radial distribution of a 453 FISH signals on Chr.4. **\*P** <  $10^{-3}$ ; **\*\*P** <  $10^{-4}$  (Mann-Whitney U tests). **i** Correlation between observed and expected relative distance of FISH signals to the nuclear periphery (chromosome 4).

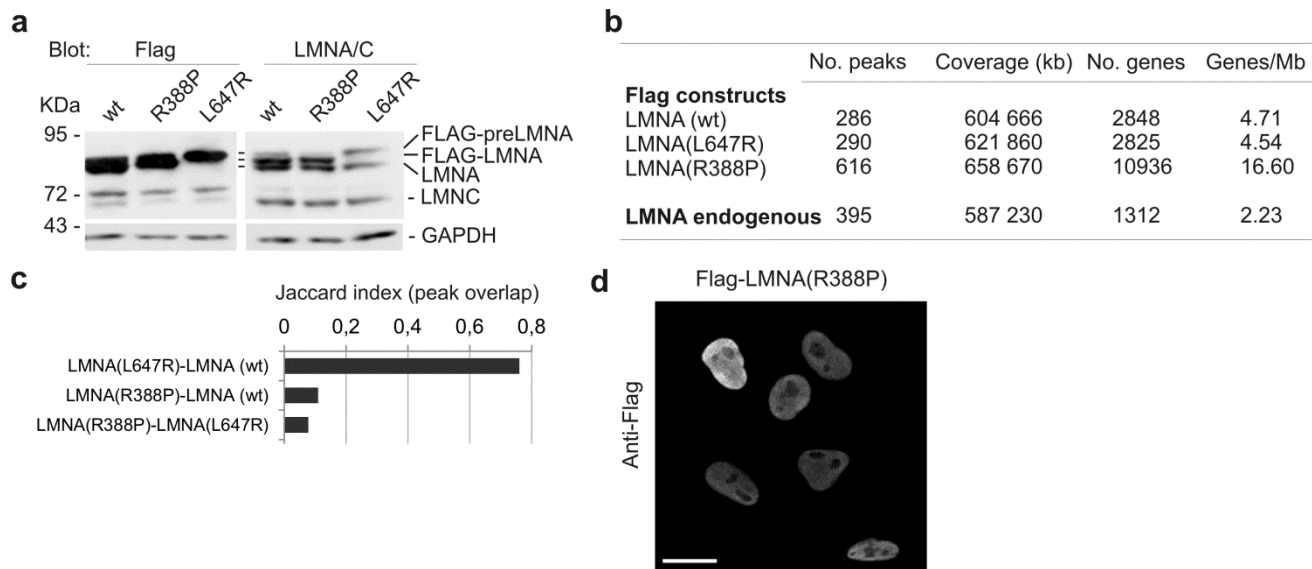

**Fig. S10** Expression of Flag-LMNA wt, Flag-LMNA(R388P) and Flag-LMNA(L647R) in HeLa cells. **a** Western blot analysis of expression of each LMNA construct, using anti-Flag and anti-lamin A/C antibodies. GAPDH was immunoblotted as loading control. **b** Genomic properties of LADs for LMNA wt, LMNA(R647R) and LMNA(R388P) mapped by Flag ChIP-seq. Properties of endogenous LMNA LADs are also shown. **c** Jaccard index of overlap of LMNA wt and mutant LADs. **d** Immunofluorescence localization of Flag-LMNA(R388P); nucleoplasmic distribution is independent of expression level. Bar, 20  $\mu$ m.



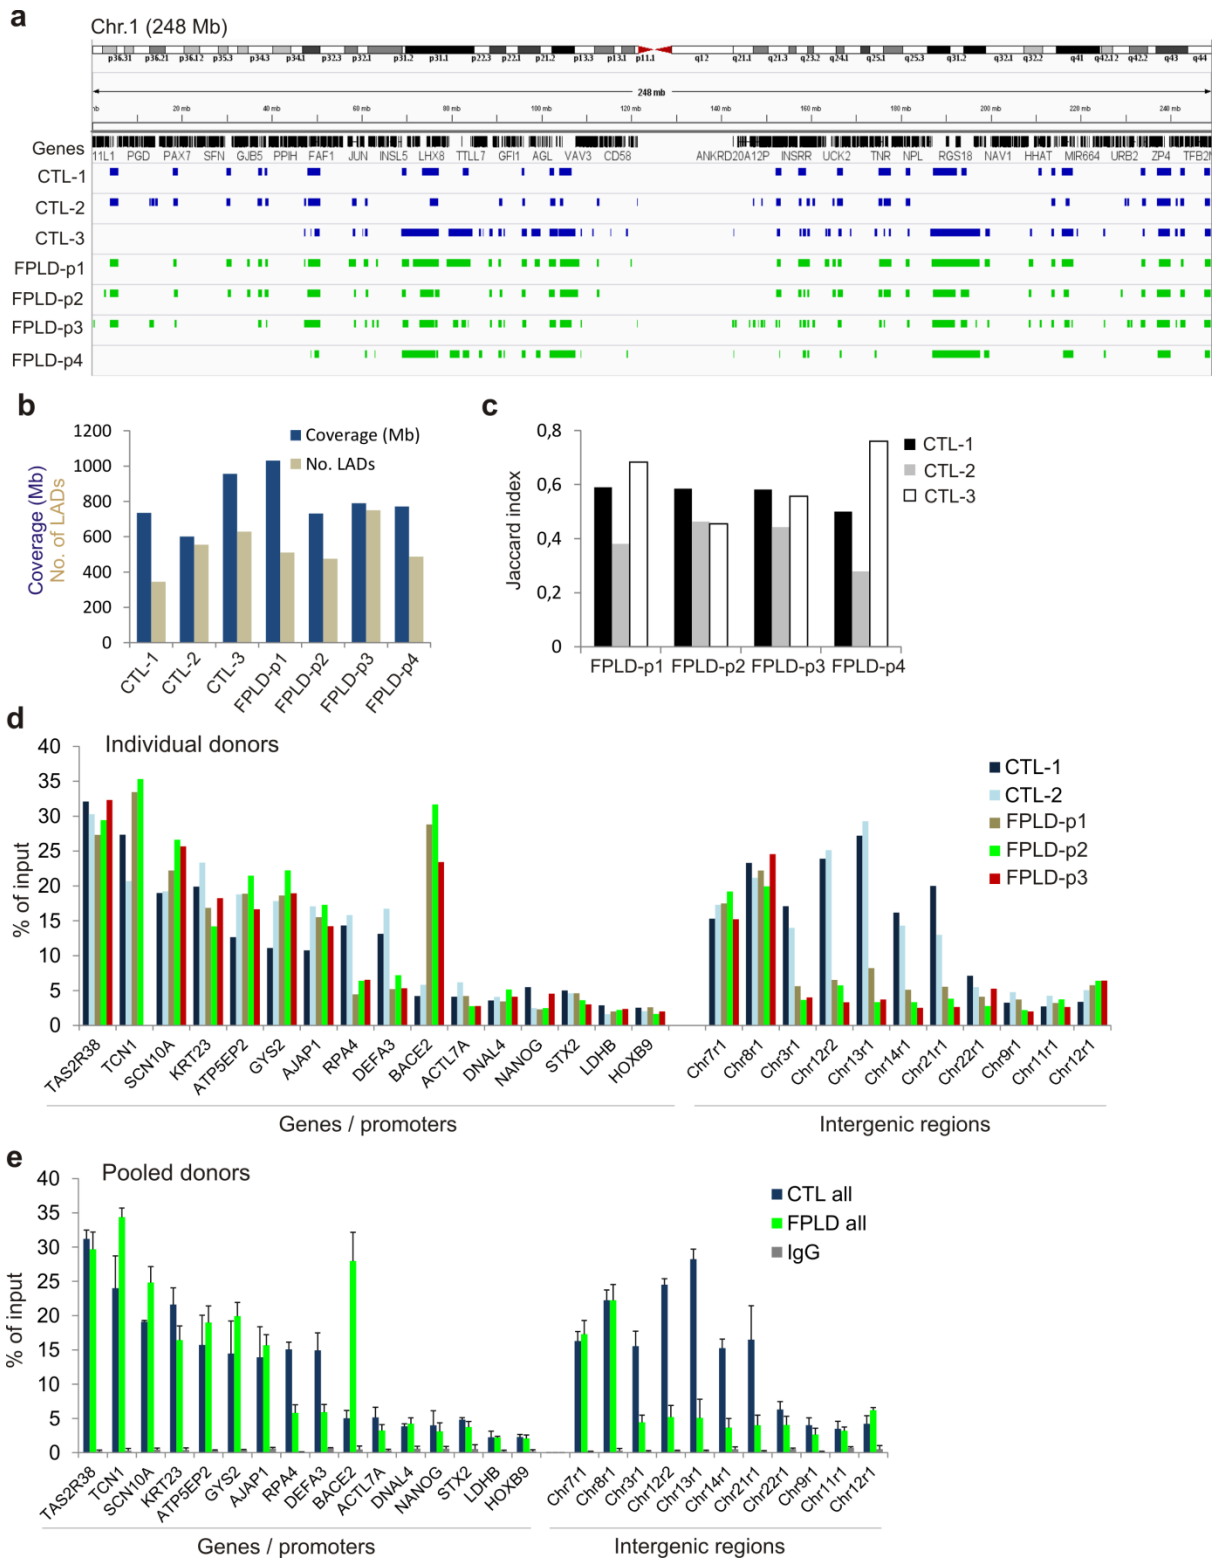

**Fig. S11** LMNA LADs in FPLD2 patient and control fibroblasts. **a** IGV browser view (chromosome 1) of LADs for 3 controls (CTL) and 4 FPLD2 patients, mapped by LMNA ChIP-seq. Tracks for CTL-3 and all FPLD2 samples are new to this study. Tracks for CTL-1 and CTL-2 are generated from our previous data [46] (GEO GSE54334, samples GSM1313339, GSM 1313397). **b** LAD coverage and

number in each cell type, determined using Enriched Domain Detector [46]. **c** Jaccard index analysis of overlap of LADs in each of the four FPLD2 fibroblasts (x axis) with LADs of the three controls. **d** CHIP-qPCR validation of LMNA enrichment in indicated regions in control and FPLD2 fibroblasts. **e** Same data as in **D** but pooled within controls and patients. Control IgG ChIPs were for two control and two FPLD2 fibroblast cultures, and data pooled (mean  $\pm$  SD of all donors).
